# Supplementary material
Source: PubMed Central journal article supplement (PMC5776468)

Supplemental Figure 1

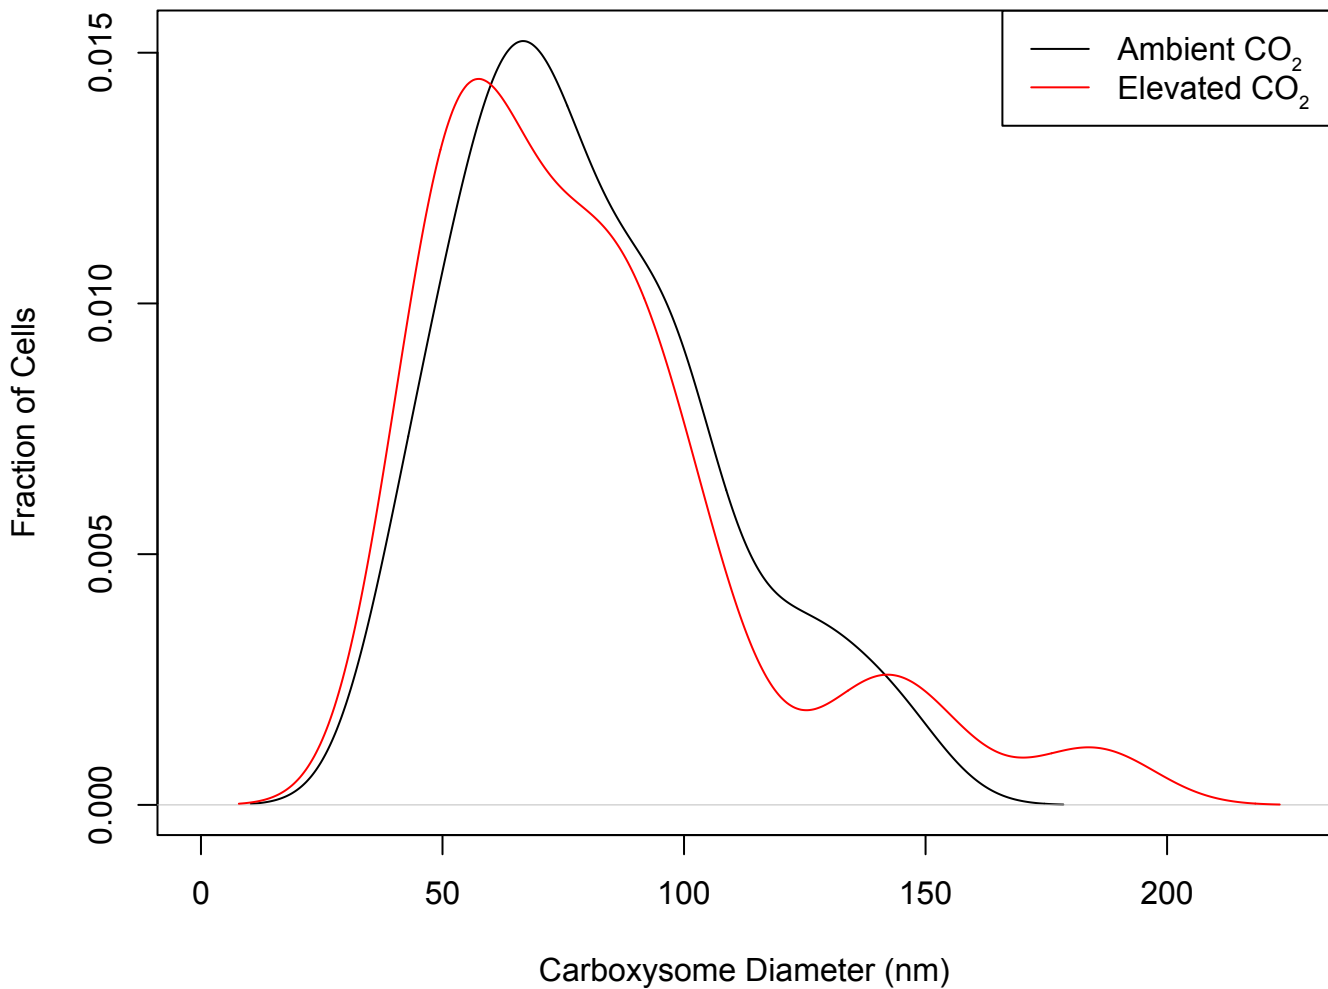

Supplement: ismej2017189x1.pdf [file ismej2017189x1.pdf]
